# Supplementary material for: Cell Cycle Progression Determines Wing Morph in the Polyphenic Insect Nilaparvata lugens
Source: PubMed Central journal article supplement — iScience. 2020 Apr 10;23(4):101040. doi: 10.1016/j.isci.2020.101040 (PMC7170998; doi:10.1016/j.isci.2020.101040), 2020-04-10
Supplement: mmc1.pdf [file mmc1.pdf]

iScience, Volume 23

## Supplemental Information

### Cell Cycle Progression Determines Wing Morph in the Polyphenic Insect *Nilaparvata lugens*

Xinda Lin, Han Gao, Yili Xu, Yuwei Zhang, Yan Li, Mark D. Lavine, and Laura Corley  
Lavine

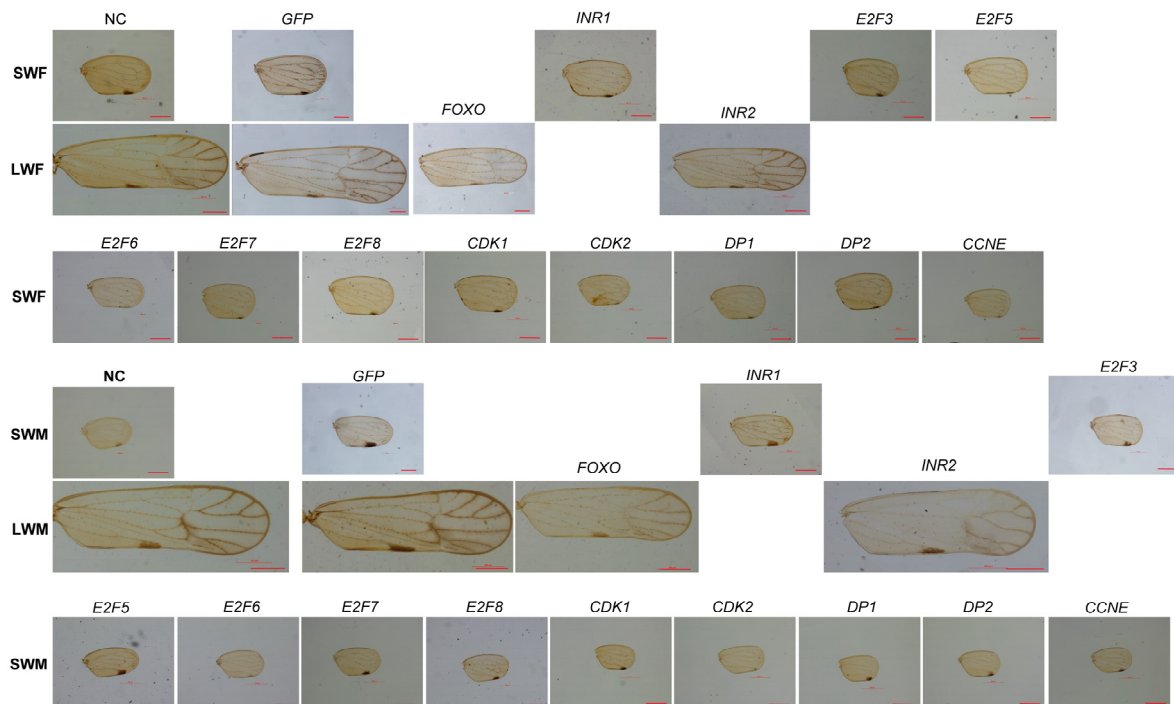

**Figure S1: Representative long and short wings after treatment at the 4<sup>th</sup> instar nymph stage, Related to Figure 4.**

SWF: short-winged female, SWM: short-winged male, LWF: long-winged female, LWM: long-winged male.

Scale bar = 500  $\mu$ m.

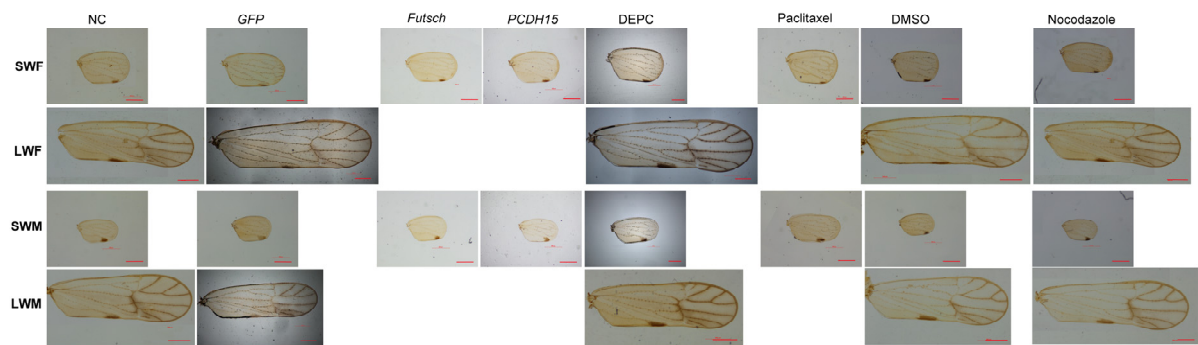

**Figure S2: Representative long and short wings after treatment at the 5<sup>th</sup> instar nymph stage, Related to Figure 5.**

SWF: short-winged female, SWM: short-winged male, LWF: long-winged female, LWM: long-winged male.

Scale bar = 500  $\mu$ m.

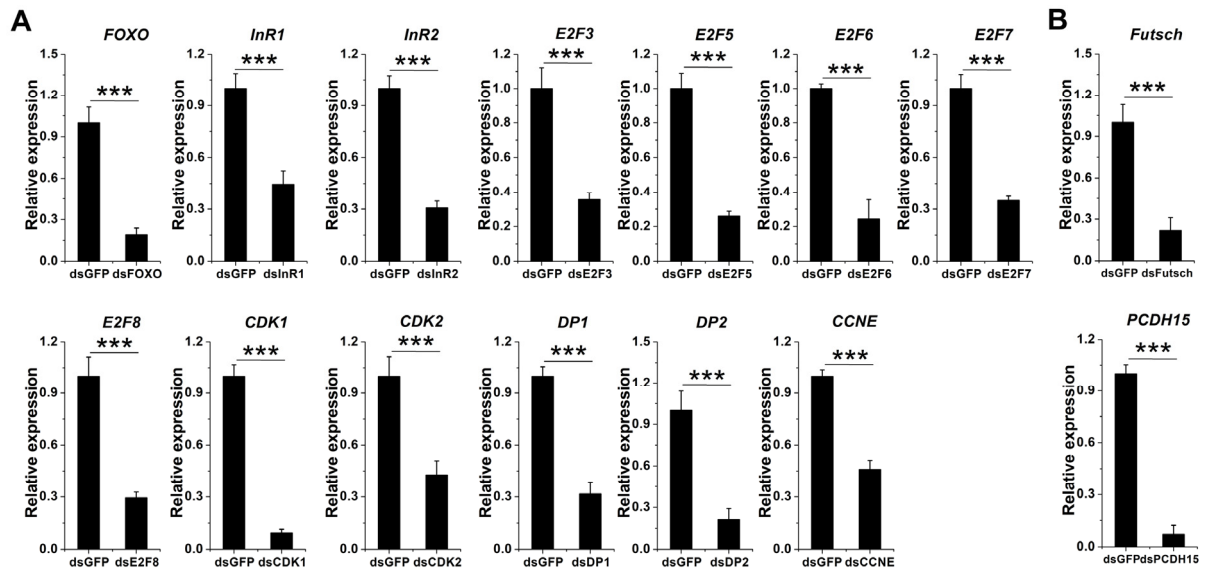

**Figure S3: Relative expression of genes down-regulated by RNAi, Related to Figure 4 , 5 and 6.**

dsRNA of *InR1*, *InR2* and *FOXO*, *E2F3*, *E2F5*, *E2F6*, *E2F7*, *E2F8*, *CDK1*, *CDK2*, *DP1*, *DP2* and *CCNE* were injected into 4<sup>th</sup> instar nymphs (A) and dsRNA of *PCDH15* and *Futsch* were injected into the 5<sup>th</sup> instar nymphs (B). Relative abundance of each transcript three days after dsRNA injection was compared with that from control nymphs injected with GFP dsRNA. Twelve biological replicates were used for each treatment. Bars represent means of three separate measurements. Student's *t*-test was used for statistical comparison. \*: P<0.05, \*\*: P<0.01, \*\*\*: P<0.001. The primers for RT-PCR were listed in Table S3.

**Table S1: Primers for cloning, Related to Figure 1, 2, 4, 5, 6 and 7.**

| <b>Name</b> | <b>Sequence (5'-3')</b> | <b>GenBank Accession Number</b> |
|-------------|-------------------------|---------------------------------|
| E2F3F       | CACCTCTCCTACAAGTGCAC    | XM_022345983.1                  |
| E2F3R       | CAAGGCCACTGAGAGGAATC    |                                 |
| E2F5F       | GTGCTTGAAGGAATCGGTCT    | MT240933                        |
| E2F5R       | TCTTCTGCGCAAACCTCAGTT   |                                 |
| E2F6F       | GTGCCAATCGAGTCCACATC    | MT240934                        |
| E2F6R       | TCCTGTGGACTATCAGCAGC    |                                 |
| E2F7F       | AGACAGGCTCTTCGAGATCT    | XM_022328840.1                  |
| E2F7R       | CAACCCCAATAACTCGAGCA    |                                 |
| E2F8F       | TCATTCTAACCCACCATCCA    | XR_002606046.1                  |
| E2F8R       | ATGAATGATGGGTGGGTGGA    |                                 |
| DP1F        | GACTCCTGCCAACAACCAAG    | XM_022342425.1                  |
| DP1R        | TTCCTGCACCGAGTTTGTG     |                                 |
| DP2F        | CACAGCGCCTTCATGATCTC    | MT240935                        |
| DP2R        | CATCGTCGGAGTAGTCGTGA    |                                 |
| CDK1F       | GCTTGAGAAGATCGGTGAGG    | XM_022336874.1                  |
| CDK1R       | AACACCCGAGCAATACTTCG    |                                 |
| CDK2F       | TACCGCGCGCCTGAGATA      | XM_022351965.1                  |
| CDK2R       | GGGAATAGCGGCTTGTAATCC   |                                 |
| CCNEF       | GGACGAGACCTTCTACGAGG    | XM_022344075.1                  |
| CCNER       | CATTGCAGGCTCCATCAGTC    |                                 |
| FutF        | GCAGTGTCAAGAGTTGGTCG    | XM_022348003.1                  |
| FutR        | CTCTCTGGTTCCTGTGCAGA    |                                 |
| PCDH15F     | GCCATTGATGCTGATGAGGG    | MT240936                        |
| PCDH15R     | CAGTGTGATCGGTCTGGGTA    |                                 |

|       |                      |              |
|-------|----------------------|--------------|
| FOXOF | CTGTTCCCTGAATCGCCGCT | KM250122     |
| FOXOR | CGTTGCAGTCGAATCCGTCG |              |
| InR1F | GCAGTGGCTCAACAACAAGA | KF974333.1   |
| InR1R | CCTCGCTGAAGAAGTCCAAC |              |
| InR2F | GGAGCTATGGTGTCTTGTG  | XM_022333236 |
| InR2R | CTTGAGTTGGCCTCATTGGT |              |

---

**Table S2: Primers for dsRNA synthesis, Related to 1, 2, 4, 5, 6 and 7.**

| <b>Name</b> | <b>Sequence (5'-3')</b>                          |
|-------------|--------------------------------------------------|
| dsE2F3F     | TAATACGACTCACTATAGGGAGACCACCACCTCTCCTACAAGTGCAC  |
| dsE2F3R     | TAATACGACTCACTATAGGGAGACCACCAAGGCCACTGAGAGGAATC  |
| dsE2F5F     | TAATACGACTCACTATAGGGAGACCACGTGCTTGAAATCGGTCT     |
| dsE2F5R     | TAATACGACTCACTATAGGGAGACCACCTTCTGCGCAAACCTCAGTT  |
| dsE2F6F     | TAATACGACTCACTATAGGGAGACCACGTGCCAATCGAGTCCACATC  |
| dsE2F6R     | TAATACGACTCACTATAGGGAGACCACCTCCTGTGGACTATCAGCAGC |
| dsE2F7F     | TAATACGACTCACTATAGGGAGACCACAGACAGGCTCTTCGAGATCT  |
| dsE2F7R     | TAATACGACTCACTATAGGGAGACCACCAACCCCAATAACTCGAGCA  |
| dsE2F8F     | TAATACGACTCACTATAGGGAGACCACCTCATTCTAACCACCATCCA  |
| dsE2F8R     | TAATACGACTCACTATAGGGAGACCACATGAATGATGGGTGGGTGGA  |
| dsDP1F      | TAATACGACTCACTATAGGGAGACCACGACTCCTGCCAACAACCAAG  |
| dsDP1R      | TAATACGACTCACTATAGGGAGACCACCTCCTGCACCGAGTTTGTTG  |
| dsDP2F      | TAATACGACTCACTATAGGGAGACCACCACAGCGCCTTCATGATCTC  |
| dsDP2R      | TAATACGACTCACTATAGGGAGACCACCATCGTCGGAGTAGTCGTGA  |
| dsCDK1F     | TAATACGACTCACTATAGGGAGACCACGCTTGAGAAGATCGGTGAGG  |
| dsCDK1R     | TAATACGACTCACTATAGGGAGACCACAACACCCGAGCAATACTTCG  |
| dsCDK2F     | TAATACGACTCACTATAGGGAGACCACGGACGAGACCTTCTACGAGG  |
| dsCDK2R     | TAATACGACTCACTATAGGGAGACCACCATTGCAGGCTCCATCAGTC  |
| dsCCNEF     | TAATACGACTCACTATAGGGAGACCACCTACCGCGCGCCTGAGATA   |
| dsCCNER     | TAATACGACTCACTATAGGGAGACCACGGGAATAGCGGCTTGTAATCC |
| dsFutF      | TAATACGACTCACTATAGGGAGACCACGCAGTGTCAAGAGTTGGTCCG |
| dsFutR      | TAATACGACTCACTATAGGGAGACCACCTCTCTGGTTCTGTGCAGA   |
| dsPCDH15F   | TAATACGACTCACTATAGGGAGACCACGCCATTGATGCTGATGAGGG  |
| dsPCDH15R   | TAATACGACTCACTATAGGGAGACCACCAGTGTGATCGGTCTGGGTA  |
| dsFOXOF     | TAATACGACTCACTATAGGGAGACCACCTGTTCCCTGAATCGCCGCT  |

|         |                                                      |
|---------|------------------------------------------------------|
| dsFOXOR | TAATACGACTCACTATAGGGAGACCACCGTTGCAGTCGAATCCGTCG      |
| dsInR1F | TAATACGACTCACTATAGGGAGACCACGCAGTGGCTCAACAACAAGA      |
| dsInR1R | TAATACGACTCACTATAGGGAGACCACCCTCGCTGAAGAAGTCCAAC      |
| dsInR2F | TAATACGACTCACTATAGGGAGACCACGGAGCTATGGTGTGTCTTGTG     |
| dsInR2R | TAATACGACTCACTATAGGGAGACCACCTTGAGTTGGCCTCATTGGT      |
| dsGFPF  | TAATACGACTCACTATAGGGAGACCACTTTGTATAGTTCATCCATGCCATGT |
| dsGFPR  | TAATACGACTCACTATAGGGAGACCACATGAGTAAAGGAGAAGAAGTCTTCA |

---



**Table S3: Primers for RT-PCR, Related to Figure 7 and S3.**

| <b>Name</b> | <b>Sequence (5'-3')</b> | <b>Size (bp)</b> |
|-------------|-------------------------|------------------|
| E2F3QF      | CCGAGCTGCTCTTCATGTT     | 95               |
| E2F3QR      | AAATGTGCCAATCGAGTCCA    |                  |
| E2F5QF      | CCTGCCGACGACATCAATAT    | 105              |
| E2F5QR      | TCTTTTCGACTTTTCCGCCT    |                  |
| E2F6QF      | TCTAAGATGGGAGGCCAAGT    | 105              |
| E2F6QR      | ATCCTCTCAGTGGCCTTGA     |                  |
| E2F7QF      | CGTCAATCACAAGGGACACA    | 105              |
| E2F7QR      | GGCTGTTTTGCTGATGAGATG   |                  |
| E2F8QF      | ACATGTCTGCTATTCCCAAC    | 103              |
| E2F8QR      | ATGAAACGTTGTGGAGGGTG    |                  |
| DP1QF       | TGCTGATGAGTTGGTCGAAG    | 97               |
| DP1QR       | TGCATCGTACACCCTTCTTC    |                  |
| DP2QF       | CTGATTGCCGAGGAAGTGAG    | 98               |
| DP2QR       | TCGTCCGAGTAGTCGTGAG     |                  |
| CDK1QF      | CAAGATTCTCAGCACACCGA    | 102              |
| CDK1QR      | TGATTGAGAGTGTGGTGGTC    |                  |
| CDK2QF      | TGTCGAATCGCAAACCTCTT    | 96               |
| CDK2QR      | GCCAAGTCGTTTCATCAGGA    |                  |
| CCNEQF      | GTTCGTGAGGTTGGTTCAGT    | 95               |
| CCNEQR      | GGTAGACACAAGTAGCTGCC    |                  |
| FutQF       | AAGCAGCAAAGTGTGGAGAA    | 99               |
| FutQR       | CTTGGCAGCTGTCACTTTTG    |                  |
| PCDH15QF    | CTTATGAGTTTGTGGTGCGC    | 102              |
| PCDH15QR    | ACACTTCGGCATTGATACCC    |                  |

|         |                           |     |
|---------|---------------------------|-----|
| FOXOQF  | ACCGGTTTCATGCGCGTACAG     | 96  |
| FOXOQR  | CTCGACGGCGAGCTGATTTG      |     |
| InR1QF  | GTCGGAGGAGATCAGCAGTC      | 101 |
| InR1QR  | CCACGTCTCTGTGCACGTAT      |     |
| InR2QF  | GGAGCTATGGTGTGTCTTG       | 97  |
| InR2QR  | CCTGCAAGTACGTAGGCTAA      |     |
| RPS15QF | TAAAAATGGCAGACGAAGAGCCCAA | 150 |
| RPS15QR | TTCCACGGTTGAAACGTCTGCG    |     |

---

1

Table S4: Shapiro-Wilk normality test ( P-value ) , Related to Figure 7.

| <b>Gene Template</b> | <i>CCNE</i> | <i>CDK1</i> | <i>CDK2</i> | <i>DP1</i> | <i>DP2</i> | <i>E2F3</i> | <i>E2F5</i> | <i>E2F6</i> | <i>E2F7</i> | <i>E2F8</i> | <i>FOXO</i> | <i>InR1</i> | <i>InR2</i> | <i>Futsch</i> | <i>PCDH15</i> |
|----------------------|-------------|-------------|-------------|------------|------------|-------------|-------------|-------------|-------------|-------------|-------------|-------------|-------------|---------------|---------------|
| dsGFP                | 0.468       | 0.96        | 0.353       | 0.102      | 0.957      | 0.633       | 0.214       | 0.278       | 0.369       | 0.353       | 0.831       | 0.643       | 0.294       | 0.741         | 0.875         |
| dsCCNE               | 0.149       |             |             |            |            |             |             |             |             |             |             |             |             |               |               |
| dsCDK1               |             | 0.298       |             |            |            |             |             |             |             |             |             |             |             |               |               |
| dsCDK2               |             |             | 0.492       |            |            |             |             |             |             |             |             |             |             |               |               |
| dsDP1                |             |             |             | 0.082      |            |             |             |             |             |             |             |             |             |               |               |
| dsDP2                |             |             |             |            | 0.27       |             |             |             |             |             |             |             |             |               |               |
| dsE2F3               |             |             |             |            |            | 0.361       |             |             |             |             |             |             |             |               |               |
| dsE2F5               |             |             |             |            |            |             | 0.468       |             |             |             |             |             |             |               |               |
| dsE2F6               |             |             |             |            |            |             |             | 0.313       |             |             |             |             |             |               |               |
| dsE2F7               |             |             |             |            |            |             |             |             | 0.181       |             |             |             |             |               |               |
| dsE2F8               |             |             |             |            |            |             |             |             |             | 0.31        |             |             |             |               |               |
| dsFOXO               |             |             |             |            |            |             |             |             |             |             | 0.89        |             |             |               |               |
| dsInR1               |             |             |             |            |            |             |             |             |             |             |             | 0.084       |             |               |               |
| dsInR2               |             |             |             |            |            |             |             |             |             |             |             |             | 0.603       |               |               |
| dsFutsch             |             |             |             |            |            |             |             |             |             |             |             |             |             | 0.401         |               |
| dsPCDH15             |             |             |             |            |            |             |             |             |             |             |             |             |             |               | 0.114         |

2

3

4

5

6

7

8

9

10

11

12

1

Table S5: Shapiro-Wilk normality test ( P-value ) , Related to Figure 7.

| <b>Template \ Gene</b>       | <i>CCNE</i> | <i>CDK1</i> | <i>CDK2</i> | <i>DP1</i> | <i>DP2</i> | <i>E2F3</i> | <i>E2F5</i> | <i>E2F6</i> | <i>E2F7</i> | <i>E2F8</i> | <i>Futsch</i> | <i>PCDH15</i> |
|------------------------------|-------------|-------------|-------------|------------|------------|-------------|-------------|-------------|-------------|-------------|---------------|---------------|
| <b>dsGFP+H<sub>2</sub>O</b>  | 0.975       | 0.08        | 0.505       | 0.604      | 0.808      | 0.294       | 0.998       | 0.578       | 0.124       | 0.502       | 0.078         | 0.391         |
| <b>dsGFP+PTX</b>             | 0.405       | 0.632       | 0.935       | 0.883      | 0.447      | 0.929       | 0.183       | 0.615       | 0.799       | 0.09        | 0.122         | 0.669         |
| <b>dsFOXO+H<sub>2</sub>O</b> | 0.191       | 0.053       | 0.136       | 0.216      | 0.574      | 0.871       | 0.814       | 0.194       | 0.286       | 0.664       | 0.544         | 0.158         |
| <b>dsFOXO+PTX</b>            | 0.986       | 0.35        | 0.423       | 0.893      | 0.285      | 0.216       | 0.887       | 0.125       | 0.38        | 0.104       | 0.074         | 0.269         |

2  
3

4

5

6

7

8

9

10

11

12

13

## 1 **Transparent Methods**

### 2 **Insect rearing**

3 Brown planthoppers were maintained in the lab and were originally a gift of Z.R. Zhu (Institute of Insect  
4 Science, Zhejiang University, China). The long- and short-winged adults were classified based on wing  
5 morphology as previously reported (Lin et al., 2016a; Lin et al., 2016b; Lin et al., 2016c). Seedlings of rice  
6 variety Ilyou-023 (*Oryza sativa* L. cv.) cultured with nutrient solution (Yoshida et al., 1976) were used to feed  
7 the insects. Insects were maintained at 28°C, light:dark = 14h:10h, 70%-80% humidity.

### 8 **Wing-bud dissection and staining**

9 Brown planthopper nymphs were developmentally staged and collected. Wing pads were dissected in cold  
10 (4°C) PBS. Dissected wing pads were then fixed in 4% paraformaldehyde in PBS (Sangon Biotech, Shanghai,  
11 China) and washed three times in PBS (15 min./wash). For visualization of the nucleus, DAPI (1:1000, Sangon  
12 Biotech, Shanghai, China) was used. Phalloidin-iFluor 488 (1:100, Abcam, USA) was used for visualization of  
13 the actin cytoskeleton. Samples were incubated with stain for 1 hour at room temperature, then washed four  
14 times in PBS (15 min./wash) and mounted on slides in Anti-Fade Mounting Medium (Sangon Biotech,  
15 Shanghai, China).

### 16 **Light Microscopy**

17 A Zeiss confocal microscope (Zeiss LSM800, Zeiss, Germany) was used to visualize nuclei (DAPI) and  
18 actin cytoskeletons (Phalloidin-iFluor 488, Abcam, USA) of the wing pads. The distal region of the wing-pads  
19 was imaged. Images were acquired using Axion Vision and were processed using Adobe Photoshop 10.

### 20 **Transmission Electron Microscopy (TEM)**

21 Dissected wing-pads were fixed in 2.5% glutaraldehyde for 12 h, rinsed with 0.1M PBS (pH7) 3 times for  
22 15 min each, fixed in 1% osmium tetroxide for 1.5 h, then rinsed twice in PBS (15 min each). Wing pads were  
23 then sequentially dehydrated with 50%, 70%, 80%, 90%, 95% ethanol, 15min each wash, 100% ethanol for 20  
24 min and then 100% acetone for 20 min. The sample was treated with embedding agent and acetone at a volume  
25 ratio of 3:1 for 1 h, followed by a volume ratio of 1:1 for 3 h, and then with pure embedding agent for 12 h.  
26 The sample was placed in a heating polymerization apparatus at 70° C for 48 h, the excess resin was removed,  
27 and the sample was sliced using a Leica EM UC7 slicer, to a thickness of 70nm per slice. Slices were stained  
28 using uranyl acetate 50% ethanol saturated solution for 1 h, double distilled water elution, citric acid lead  
29 staining for 15 min, and the sample was observed using a Hitachi H-7650 electron microscopic.

### 30 **Cloning of genes for dsRNA synthesis**

31 Total RNA was extracted using the Trizol-based RNAiso Plus total RNA extraction kit (Takara, Dalian,  
32 China), and the Roche Transcriptor First Strand cDNA synthesis kit (Roche Applied Science, Shanghai, China)  
33 was used to synthesize first strand cDNA. Sequences of *NilnR1*, *NilnR2* and *NIFOXO* were identified from  
34 previously published *N. lugens* sequences (Lin et al., 2016b; Lin et al., 2016c; Xu et al., 2015). The previously  
35 cloned *InR1* and *FOXO* DNA fragments used as templates for dsRNA synthesis were amplified by PCR using

1 Ex-Taq polymerase (Takara, Dalian, China). *E2F3*, *E2F5*, *E2F6*, *E2F7*, *E2F8*, *CDK1*, *CDK2*, *DPI*, *DP2*  
2 *CCNE*, *Futsch* and *PCDH15* were identified from the transcriptome sequence (Xue et al., 2010) and the NCBI  
3 database ([www.ncbi.nlm.nih.gov](http://www.ncbi.nlm.nih.gov)). All the primers are listed in Table S1. Genes were then cloned, confirmed  
4 by sequencing, and used as template for double stranded RNA (dsRNA) synthesis.

#### 5 **Injection of dsRNA and chemical inhibitors**

6 RiboMAX™ Large Scale RNA Production System-T7 (Promega, Beijing, China) was used to synthesize  
7 dsRNA. dsRNAs of *InR1*, *FOXO*, *E2F3*, *E2F5*, *E2F6*, *E2F7*, *E2F8*, *CDK1*, *CDK2*, *DPI*, *DP2* and *CCNE*,  
8 were synthesized. The procedure was the same as described in Technical Bulletin TB166 (Promega, Beijing,  
9 China) except different templates were used to synthesize dsRNAs and different dsRNA primers (with a  
10 27-base T7 sequence at the 5' end, Table S2) were used. Nocodazole (0.1 mM, dissolved in DMSO, MedChem  
11 Express, Shanghai, China) and Paclitaxel (0.1 mM, dissolved in DEPC-treated water, Sangon Biotech,  
12 Shanghai, China) were injected into 5<sup>th</sup> instar nymphs in a total volume of 0.1 µl per nymph. 4<sup>th</sup> and 5<sup>th</sup> instar  
13 brown planthopper nymphs were anesthetized by CO<sub>2</sub> before injection. A Nikon microscope and Narishige  
14 injection system (MN-151, Narishige) were used for injection and the procedure was the same as previously  
15 described (Lin et al., 2014). Each nymph was injected with 0.1 µg dsRNA, and afterwards the nymphs were  
16 allowed to recover for 2 hours before being returned to rice seedlings.

#### 17 **RT-PCR**

18 Total RNA was isolated from dissected wing pads as above. 12 biological replicates were used for each  
19 treatment and twenty brown planthoppers were pooled for each replicate. Three technical replicates were used  
20 for each biological replicate and were averaged for statistical analysis. Sample sizes were indicated in the figure  
21 legend. Roche SYBR® Green PCR Master Mix and SYBR® Green RT-PCR Reagents kits (Roche Applied  
22 Science, Shanghai, China) were used for RT-PCR and first-strand cDNA synthesis, which was diluted 20 times  
23 after synthesis. For the first strand cDNA synthesis, we used 25 µl reaction, and 2 µl of diluted cDNA was used  
24 as template. Roche SYBR® Green PCR Master Mix and SYBR® Green RT-PCR Reagents kits (Roche  
25 Applied Science, Shanghai, China) were used for RT-PCR and first-strand cDNA synthesis, which was diluted  
26 20 times after synthesis. For the first strand cDNA synthesis, we used 25 µl reaction, and 2 µl of diluted cDNA  
27 was used as template. 2<sup>-ΔΔCt</sup> relative expression method was used for the expression level comparison (Livak  
28 and Schmittgen, 2001). The reference gene (*RPS15*) used was selected according to a previous study (Yuan et  
29 al., 2014). The primers used are shown in Table S3.

#### 30 **Measuring the number of nuclei**

31 Image J (National Institutes of Health, USA) was used for nuclei number counting. The area was delineated,  
32 which was 475 µm<sup>2</sup> per block. The number of blocks used was not less than 9. The images were transformed  
33 into 8-bit TIFF format, i.e., the color picture was changed into black and white.

#### 34 **Flow cytometry**

1 Wings were removed from newly emerged brown planthopper adults and placed in a 1.5 mL centrifuge  
2 tube in PBS. The wings were ground with a pestle. The ground samples were centrifuged (10000 g, 4°C, 3  
3 min), the supernatant was discarded, the samples were resuspended in ethanol (100%) and placed on ice for 1 h,  
4 and then centrifuged (10000 g, 3 min, 4°C), the supernatant was discarded, the samples were resuspended in  
5 1X PBS plus 0.25% Triton, and then held at 4°C for 10 min. The sample was centrifuged (10000g, 3min), the  
6 supernatant was discarded, and DAPI (1:1000, Sigma Aldrich, Shanghai, China) was then added. Samples  
7 were then measure in a Beckman CytoFLEX flow cytometer. Cell cycle analysis was carried out using FlowJo  
8 (FlowJo, LLC, USA).

### 9 **Statistical analysis**

10 SPSS 20.0 was used for statistical analyses. Chi-square test was used for comparison of the wing-morph  
11 ratios after treatment with dsRNAs. For independent sample t test, we first analyzed whether the data was  
12 normally distributed. Then independent sample t tests were carried out.

13 For one-way ANOVA, we first checked that the data of each group was normally distributed (Table S4, S5).  
14 Then ANOVA was carried out, and multiple comparison methods were selected based on the homogeneity test  
15 results. If the variance was homogeneous, we selected the LSD method under "Assumed Homogeneity of  
16 Variance" in the multiple comparisons; if the variance was not homogeneous, we selected Dunnett's T3 under  
17 "Unhypothesized Homogeneity of Variance". Different letters indicate significant differences ( $P < 0.01$ ).

18  
19  
20  
21  
22  
23  
24  
25  
26  
27  
28  
29  
30  
31  
32  
33  
34  
35  
36

## 1 Supplemental References

- 2 Lin, X., Xu, Y., Yao, Y., Wang, B., Lavine, M.D., and Lavine, L.C. (2016a). JNK signaling mediates wing form  
3 polymorphism in brown planthoppers (*Nilaparvata lugens*). *Insect Biochem Mol Biol* 73, 55-61.
- 4 Lin, X., Yao, Y., Jin, M., and Li, Q. (2014). Characterization of the Distal-less gene homologue, NIDII, in the brown  
5 planthopper, *Nilaparvata lugens* (Stal). *Gene* 535, 112-118.
- 6 Lin, X., Yao, Y., Wang, B., Emlen, D.J., and Lavine, L.C. (2016b). Ecological Trade-offs between Migration and  
7 Reproduction Are Mediated by the Nutrition-Sensitive Insulin-Signaling Pathway. *Int J Biol Sci* 12, 607-616.
- 8 Lin, X., Yao, Y., Wang, B., Lavine, M.D., and Lavine, L.C. (2016c). FOXO links wing form polyphenism and  
9 wound healing in the brown planthopper, *Nilaparvata lugens*. *Insect Biochem Mol Biol* 70, 24-31.
- 10 Livak, K.J., and Schmittgen, T.D. (2001). Analysis of relative gene expression data using real-time quantitative PCR  
11 and the 2<sup>-</sup>(Delta Delta C(T)) Method. *Methods* 25, 402-408.
- 12 Xu, H.J., Xue, J., Lu, B., Zhang, X.C., Zhuo, J.C., He, S.F., Ma, X.F., Jiang, Y.Q., Fan, H.W., Xu, J.Y., *et al.* (2015).  
13 Two insulin receptors determine alternative wing morphs in planthoppers. *Nature* 519, 464-467.
- 14 Xue, J., Bao, Y.-Y., Li, B.-I., Cheng, Y.-B., Peng, Z.-Y., Liu, H., Xu, H.-J., Zhu, Z.-R., Lou, Y.-G., Cheng, J.-A., *et*  
15 *al.* (2010). Transcriptome Analysis of the Brown Planthopper *Nilaparvata lugens*. *PLoS One* 5, e14233.
- 16 Yoshida, S., Forno, D.A., and Cock, J.H. (1976). Laboratory manual for physiological studies of rice (International  
17 Rice Research Institute).
- 18 Yuan, M., Lu, Y., Zhu, X., Wan, H., Shakeel, M., Zhan, S., Jin, B.R., and Li, J. (2014). Selection and evaluation of  
19 potential reference genes for gene expression analysis in the brown planthopper, *Nilaparvata lugens* (Hemiptera:  
20 Delphacidae) using reverse-transcription quantitative PCR. *PLoS One* 9, e86503.
- 21
